# Supplementary figures and images for: Autoimmune myocarditis is not associated with left ventricular systolic dysfunction
Source: PubMed Central journal article supplement — Eur J Clin Invest. 2019 Jun 14;49(8):e13132. doi: 10.1111/eci.13132 (PMC6771695; doi:10.1111/eci.13132), 2019-06-14

# Supplementary Figure

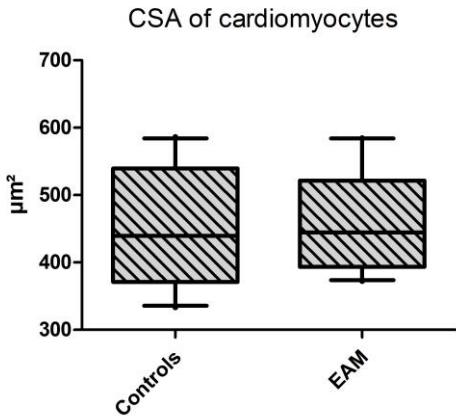

Supplement: ECI-49-na-s001.pdf [file ECI-49-na-s001.pdf]
